# Supplementary material for: Intermolecular interactions in clusters of ethylammonium nitrate and 1-amino-1,2,3-triazole
Source: Royal Society of Chemistry journal article supplement (doi:10.1039/d3cp02407e), 2023-01-01
Supplement: d3cp02407e1.pdf [file d3cp02407e1.pdf]

**Supplementary Information for:**

Intermolecular Interactions in Clusters of Ethylammonium Nitrate and 1-Amino-  
1,2,3-triazole

Shinae Kim<sup>1,4</sup>, Justin Conrad<sup>1</sup>, Garrett Tow<sup>2</sup>, Edward A. Maginn<sup>2</sup>, Jerry A. Boatz<sup>3</sup>,  
and Mark S. Gordon<sup>1</sup>

1. Department of Chemistry and Ames Laboratory, Iowa State University, Ames, IA 50011
2. Department of Chemical & Biomolecular Engineering, University of Notre Dame, Notre Dame, Indiana 46556,
3. Aerospace Systems Directorate, Air Force Research Laboratory, Edwards Air Force Base, California 93524
4. Combustion Research Facility, Sandia National Laboratories, Livermore, California 94550

## Contents:

**Table S1.1** List of unique QUAOs for (EAN)<sub>n</sub> (n=1-6)

**Table S1.2** List of unique QUAOs for (EAN)<sub>8</sub>

**Table S2.1** List of unique QUAOs for (EAN)<sub>10</sub>

**Table S2.2** List of unique QUAOs for (EAN)<sub>12</sub>

**Table S2.3** List of unique QUAOs for (EAN)<sub>16</sub>

**Table S3.1** List of unique QUAOs for N···O interactions in (EAN)<sub>n</sub> (n=1-8)

**Table S3.2** List of unique QUAOs for N···O interactions in (EAN)<sub>10</sub>

**Table S3.3** List of unique QUAOs for N···O interactions in (EAN)<sub>12</sub>

**Table S3.4** List of unique QUAOs for N···O interactions in (EAN)<sub>16</sub>

**Table S4.1** List of unique QUAOs for N···O interactions in (EAN)<sub>1</sub>:(1-AT)<sub>n</sub> (n=1-5)

**Table S4.2** List of unique QUAOs for Ethylammonium N···N (1-AT) interactions in (EAN)<sub>1</sub>:(1-AT)<sub>n</sub> (n=1-5)

**Table S4.3** List of unique QUAOs for (EAN)<sub>1</sub>:(1-AT)<sub>n</sub> (n=1-5)

**Table S5.1** List of unique QUAOs for Ethylammonium N···O (Nitrate) interactions in (EAN)<sub>2</sub>:(1-AT)<sub>n</sub> (n=1-5)

**Table S5.2** List of unique QUAOs for 1-AT N···O (Nitrate) interactions in (EAN)<sub>2</sub>:(1-AT)<sub>n</sub> (n=1-5)

**Table S5.3** List of unique QUAOs for Ethylammonium N···N (1-AT) interactions in (EAN)<sub>2</sub>:(1-AT)<sub>n</sub> (n=1-5)

**Table S5.4** List of unique QUAOs for (EAN)<sub>2</sub>:(1-AT)<sub>n</sub> (n=1-5)

**Figure S1** List of low energy geometries for (EAN)<sub>n</sub> (n=4,8,10,16,24)

**Figure S2** List of low energy geometries for (EAN)<sub>1</sub>:(1-AT)<sub>n</sub> (n=1-5)

**Figure S3** List of low energy geometries for (EAN)<sub>2</sub>:(1-AT)<sub>n</sub> (n=1-5)

1. List of unique QUAOs for the (EAN)<sub>n</sub> (n=1-8)

**Table S1.1.** Atoms participating in bonding interactions (Atom1 and Atom2), bond orders (BOs) and KBOs (kcal/mol) for H-bonds in (EAN)<sub>n</sub> (n= 1-6) IL clusters. Atom numbers in Atom1 and Atom2 are labeled in Figure 2a through Figure 2e. *R* represents the H-bond distance in Å. Occ(Atom1) and Occ(Atom2) are occupations of the QUAOs centered on Atom1 and Atom2, respectively. Orbital (Atom1) and Orbital (Atom2) are types of orbitals in Atom1 and Atom2 participating in the H-bonding interactions, respectively. The KBOs in parentheses is the sum of the H-bond and N···O KBOs.

| System             | Atom1 | Atom2 | BO   | KBO<br>(kcal/mol) | R<br>(Å) | Occ<br>(Atom1) | Orbital<br>(Atom 1)          | Occ<br>(Atom2) | Orbital<br>(Atom2) |
|--------------------|-------|-------|------|-------------------|----------|----------------|------------------------------|----------------|--------------------|
| (EAN) <sub>1</sub> | O12   | H5    | 0.33 | -5.66 (-6.65)     | 1.75     | 1.91           | <i>pl</i><br>(horizontal)    | 0.61           | $\sigma$           |
|                    | O12   | H5    | 0.10 | -0.69 (-0.86)     | 1.75     | 1.82           | <i>pl</i><br>(perpendicular) | 0.61           | $\sigma$           |
| (EAN) <sub>2</sub> | O12   | H5    | 0.30 | -5.14 (-6.87)     | 1.75     | 1.92           | <i>pl</i>                    | 0.63           | $\sigma$           |
|                    | O27   | H20   | 0.29 | -4.90 (-6.47)     | 1.75     | 1.92           | <i>pl</i>                    | 0.61           | $\sigma$           |
|                    | O27   | H6    | 0.22 | -2.78 (-3.80)     | 1.83     | 1.95           | <i>pl</i>                    | 0.64           | $\sigma$           |
|                    | O15   | H20   | 0.10 | -0.80 (-1.06)     | 2.03     | 1.98           | <i>sl</i>                    | 0.61           | $\sigma$           |
| (EAN) <sub>4</sub> | O42   | H35   | 0.30 | -5.23 (-6.97)     | 1.75     | 1.92           | <i>pl</i>                    | 0.63           | $\sigma$           |
|                    | O57   | H50   | 0.30 | -4.99 (-6.64)     | 1.75     | 1.92           | <i>pl</i>                    | 0.63           | $\sigma$           |
|                    | O27   | H20   | 0.29 | -4.93 (-6.59)     | 1.75     | 1.92           | <i>pl</i>                    | 0.63           | $\sigma$           |
|                    | H21   | O12   | 0.28 | -4.60 (-6.27)     | 1.75     | 0.63           | <i>pl</i>                    | 1.92           | $\sigma$           |
|                    | O12   | H5    | 0.28 | -4.69 (-6.30)     | 1.75     | 1.93           | <i>pl</i>                    | 0.63           | $\sigma$           |
|                    | H21   | O12   | 0.23 | -2.87 (-3.88)     | 1.80     | 0.64           | $\sigma$                     | 0.64           | <i>pl</i>          |
|                    | O59   | H36   | 0.12 | -2.32 (-3.21)     | 1.90     | 0.67           | $\sigma$                     | 0.65           | <i>pl</i>          |
| (EAN) <sub>6</sub> | O72   | H65   | 0.30 | -5.09 (-6.80)     | 1.75     | 1.91           | <i>pl</i>                    | 0.63           | $\sigma$           |
|                    | O87   | H80   | 0.29 | -4.98 (-6.65)     | 1.75     | 1.92           | <i>pl</i>                    | 0.63           | $\sigma$           |
|                    | O42   | H35   | 0.29 | -4.97 (-6.65)     | 1.75     | 1.92           | <i>pl</i>                    | 0.61           | $\sigma$           |
|                    | O12   | H5    | 0.28 | -4.72 (-6.27)     | 1.75     | 1.93           | <i>pl</i>                    | 0.62           | $\sigma$           |
|                    | O27   | H20   | 0.27 | -4.46 (-5.91)     | 1.75     | 1.93           | <i>pl</i>                    | 0.63           | $\sigma$           |
|                    | O57   | H50   | 0.28 | -4.49 (-5.98)     | 1.75     | 1.93           | <i>pl</i>                    | 0.63           | $\sigma$           |
|                    | H81   | O57   | 0.22 | -2.83 (-4.49)     | 1.78     | 0.64           | $\sigma$                     | 1.94           | <i>pl</i>          |
|                    | H51   | O29   | 0.20 | -2.83 (-3.84)     | 1.86     | 0.64           | $\sigma$                     | 1.94           | <i>pl</i>          |
|                    | H7    | O44   | 0.16 | -1.48 (-2.04)     | 1.98     | 0.65           | $\sigma$                     | 1.96           | <i>pl</i>          |

**Table S1.2.** Atoms participating in bonding interactions, bond orders (BOs) and KBOs (kcal/mol) for H-bonds in (EAN)<sub>8</sub> IL clusters. Atom numbers in Atom1 and Atom2 are labeled in Figure 2c. *R* represents the H-bond distance in Å. Occ(Atom1) and Occ(Atom2) are occupations of the QUAOs centered on Atom1 and Atom2, respectively. Orbital (Atom1) and Orbital (Atom2) are types of orbitals in Atom1 and Atom2 participating in the H-bonding interactions, respectively. The KBOs in parentheses is the sum of the H-bond and N<sup>··</sup>O KBOs.

| System             | Atom1 | Atom2 | BO   | KBO<br>(kcal/mol) | R<br>(Å) | Occ<br>(Atom1) | Orbital<br>(Atom 1) | Occ<br>(Atom2) | Orbital<br>(Atom2) |
|--------------------|-------|-------|------|-------------------|----------|----------------|---------------------|----------------|--------------------|
| (EAN) <sub>8</sub> | O117  | H110  | 0.30 | -5.09 (-6.79)     | 1.75     | 1.92           | <i>pl</i>           | 0.63           | $\sigma$           |
|                    | O102  | H95   | 0.30 | -5.06 (-6.76)     | 1.75     | 1.92           | <i>pl</i>           | 0.63           | $\sigma$           |
|                    | O42   | H35   | 0.28 | -4.82 (-6.41)     | 1.75     | 1.92           | <i>pl</i>           | 0.61           | $\sigma$           |
|                    | O12   | H5    | 0.28 | -4.68 (-6.20)     | 1.75     | 1.92           | <i>pl</i>           | 0.62           | $\sigma$           |
|                    | O87   | H80   | 0.27 | -4.68 (-6.20)     | 1.75     | 1.93           | <i>pl</i>           | 0.62           | $\sigma$           |
|                    | O27   | H20   | 0.27 | -4.60 (-6.20)     | 1.75     | 1.93           | <i>pl</i>           | 0.63           | $\sigma$           |
|                    | O57   | H50   | 0.27 | -4.58 (-6.08)     | 1.75     | 1.93           | <i>pl</i>           | 0.62           | $\sigma$           |
|                    | O72   | H65   | 0.27 | -4.53 (-6.04)     | 1.75     | 1.93           | <i>pl</i>           | 0.63           | $\sigma$           |
|                    | H96   | O72   | 0.23 | -3.11 (-4.22)     | 1.81     | 0.64           | $\sigma$            | 1.94           | <i>pl</i>          |
|                    | H21   | O12   | 0.22 | -2.90 (-3.95)     | 1.80     | 0.65           | $\sigma$            | 1.94           | <i>pl</i>          |
|                    | H51   | O42   | 0.19 | -2.13 (-3.00)     | 1.95     | 0.67           | $\sigma$            | 1.96           | <i>pl</i>          |
|                    | H111  | O87   | 0.18 | -2.03 (-2.86)     | 1.96     | 0.66           | $\sigma$            | 1.96           | <i>pl</i>          |
|                    | H66   | O27   | 0.18 | -1.99 (-2.76)     | 1.89     | 0.65           | $\sigma$            | 1.96           | <i>pl</i>          |
|                    | H52   | O29   | 0.18 | -2.04 (-2.75)     | 1.93     | 0.67           | $\sigma$            | 1.90           | <i>pl</i>          |
|                    | H112  | O104  | 0.15 | -1.49 (-1.95)     | 1.96     | 0.67           | $\sigma$            | 1.90           | <i>pl</i>          |
|                    | H112  | O104  | 0.12 | -0.91 (-1.35)     | 1.96     | 0.67           | $\sigma$            | 1.98           | <i>sl</i>          |

2. List of unique QUAOs for the (EAN)<sub>10</sub> to (EAN)<sub>16</sub>

**Table S2.1.** Atoms participating in bonding interactions (Atom1 and Atom2), bond orders (BOs) and KBOs (kcal/mol) for H-bonds in (EAN)<sub>10</sub> IL clusters. Atom numbers in Atom1 and Atom2 are labeled in Figure 2f. *R* represents the H-bond distance in Å. Occ(Atom1) and Occ(Atom2) are occupations of the QUAOs centered on Atom1 and Atom2, respectively. Orbital (Atom1) and Orbital (Atom2) are types of orbitals in Atom1 and Atom2 participating in the H-bonding interactions, respectively. The KBOs in parentheses is the sum of the H-bond and N···O KBOs.

| System              | Atom1 | Atom2 | BO            | KBO<br>(kcal/mol) | R<br>(Å) | Occ<br>(Atom1) | Orbital<br>(Atom 1) | Occ<br>(Atom2) | Orbital<br>(Atom2) |
|---------------------|-------|-------|---------------|-------------------|----------|----------------|---------------------|----------------|--------------------|
| (EAN) <sub>10</sub> | O132  | H125  | 0.32          | -5.44 (-7.20)     | 1.75     | 1.91           | <i>pl</i>           | 0.61           | <i>σ</i>           |
|                     | O147  | H140  | 0.31          | -5.31 (-7.07)     | 1.75     | 1.82           | <i>pl</i>           | 0.61           | <i>σ</i>           |
|                     | O42   | H35   | 0.29          | -5.05 (-6.66)     | 1.75     | 1.91           | <i>pl</i>           | 0.61           | <i>σ</i>           |
|                     | O12   | H5    | 0.29          | -4.94 (-6.53)     | 1.75     | 1.91           | <i>pl</i>           | 0.62           | <i>σ</i>           |
|                     | O87   | H80   | 0.28          | -4.74 (-6.28)     | 1.75     | 1.92           | <i>pl</i>           | 0.61           | <i>σ</i>           |
|                     | O72   | H65   | 0.28          | -4.24 (-6.26)     | 1.75     | 1.92           | <i>pl</i>           | 0.61           | <i>σ</i>           |
|                     | O102  | H95   | 0.28          | -4.61 (-6.10)     | 1.75     | 1.93           | <i>pl</i>           | 0.62           | <i>σ</i>           |
|                     | O57   | H50   | 0.27          | -4.60 (-6.10)     | 1.75     | 1.93           | <i>pl</i>           | 0.62           | <i>σ</i>           |
|                     | O27   | H20   | 0.27          | -4.58 (-6.06)     | 1.75     | 1.93           | <i>pl</i>           | 0.62           | <i>σ</i>           |
|                     | O117  | H110  | 0.27          | -4.55 (-6.05)     | 1.75     | 1.93           | <i>pl</i>           | 0.62           | <i>σ</i>           |
|                     | H111  | O117  | 0.27          | -4.09 (-5.58)     | 1.75     | 1.93           | <i>σ</i>            | 0.62           | <i>pl</i>          |
|                     | H111  | O115  | 0.25          | -3.61 (-4.97)     | 1.75     | 1.93           | <i>σ</i>            | 0.63           | <i>pl</i>          |
|                     | H52   | O30   | 0.23          | -3.19 (-4.34)     | 1.88     | 0.63           | <i>σ</i>            | 1.93           | <i>pl</i>          |
|                     | H21   | O12   | 0.22          | -2.83 (-3.84)     | 1.82     | 0.65           | <i>σ</i>            | 1.94           | <i>pl</i>          |
|                     | H96   | O72   | 0.20          | 2.42 (-3.33)      | 1.89     | 0.66           | <i>σ</i>            | 1.91           | <i>pl</i>          |
|                     | H81   | O57   | 0.19          | -2.12 (-2.91)     | 1.95     | 0.64           | <i>σ</i>            | 1.95           | <i>pl</i>          |
| H66                 | O27   | 0.19  | -2.09 (-2.88) | 1.96              | 0.64     | <i>σ</i>       | 1.95                | <i>pl</i>      |                    |
| H51                 | O42   | 0.22  | -2.86 (-3.95) | 1.85              | 0.64     | <i>σ</i>       | 1.95                | <i>pl</i>      |                    |

**Table S2.2.** Atoms participating in bonding interactions (Atom1 and Atom2), bond orders (BOs) and KBOs (kcal/mol) for H-bonds in (EAN)<sub>12</sub> IL clusters. Atom numbers in Atom1 and Atom2 are labeled in Figure 2g. *R* represents the H-bond distance in Å. Occ(Atom1) and Occ(Atom2) are occupations of the QUAOs centered on Atom1 and Atom2, respectively. Orbital (Atom1) and Orbital (Atom2) are types of orbitals in Atom1 and Atom2 participating in the H-bonding interactions, respectively. The KBOs in parentheses is the sum of the H-bond and N···O KBOs.

| System              | Atom1 | Atom2 | BO            | KBO<br>(kcal/mol) | R<br>(Å) | Occ<br>(Atom1) | Orbital<br>(Atom 1) | Occ<br>(Atom2) | Orbital<br>(Atom2) |
|---------------------|-------|-------|---------------|-------------------|----------|----------------|---------------------|----------------|--------------------|
| (EAN) <sub>12</sub> | O177  | H170  | 0.32          | -5.44 (-7.33)     | 1.75     | 1.91           | <i>pl</i>           | 0.61           | $\sigma$           |
|                     | O132  | H125  | 0.31          | -5.31 (-6.96)     | 1.75     | 1.91           | <i>pl</i>           | 0.62           | $\sigma$           |
|                     | O147  | H140  | 0.30          | -5.05 (-6.88)     | 1.75     | 1.92           | <i>pl</i>           | 0.61           | $\sigma$           |
|                     | O42   | H35   | 0.30          | -4.94 (-6.77)     | 1.75     | 1.92           | <i>pl</i>           | 0.61           | $\sigma$           |
|                     | O162  | H155  | 0.30          | -4.74 (-6.69)     | 1.75     | 1.93           | <i>pl</i>           | 0.62           | $\sigma$           |
|                     | O102  | H95   | 0.28          | -4.72 (-6.30)     | 1.75     | 1.93           | <i>pl</i>           | 0.62           | $\sigma$           |
|                     | O72   | H65   | 0.28          | -4.61 (-6.15)     | 1.75     | 1.93           | <i>pl</i>           | 0.62           | $\sigma$           |
|                     | O87   | H80   | 0.28          | -4.60 (-6.20)     | 1.75     | 1.93           | <i>pl</i>           | 0.62           | $\sigma$           |
|                     | O27   | H20   | 0.28          | -4.58 (-6.08)     | 1.75     | 1.93           | <i>pl</i>           | 0.62           | $\sigma$           |
|                     | O117  | H110  | 0.28          | -4.55 (-6.19)     | 1.75     | 1.93           | <i>pl</i>           | 0.63           | $\sigma$           |
|                     | O57   | H50   | 0.28          | -4.09 (-6.12)     | 1.75     | 0.63           | $\sigma$            | 1.93           | <i>pl</i>          |
|                     | H156  | O14   | 0.24          | -3.61 (-4.58)     | 1.87     | 0.65           | $\sigma$            | 1.94           | <i>pl</i>          |
|                     | H141  | O117  | 0.24          | -3.19 (-4.25)     | 1.81     | 0.66           | $\sigma$            | 1.91           | <i>pl</i>          |
|                     | H111  | O72   | 0.22          | -2.83 (-3.86)     | 2.04     | 0.64           | $\sigma$            | 1.95           | <i>pl</i>          |
|                     | H 81  | O57   | 0.21          | -2.42 (-3.73)     | 2.04     | 0.64           | $\sigma$            | 1.95           | <i>pl</i>          |
|                     | H126  | O150  | 0.21          | -2.30 (-3.95)     | 1.95     | 0.65           | $\sigma$            | 1.92           | <i>pl</i>          |
|                     | H142  | O104  | 0.21          | -2.44 (-2.88)     | 1.95     | 0.65           | $\sigma$            | 1.91           | <i>pl</i>          |
|                     | H51   | O57   | 0.21          | -2.08 (-2.37)     | 1.99     | 0.68           | $\sigma$            | 1.96           | <i>pl</i>          |
| H50                 | O90   | 0.20  | -2.02 (-2.33) | 2.03              | 0.65     | $\sigma$       | 1.95                | <i>pl</i>      |                    |

**Table S2.3.** Atoms participating in bonding interactions (Atom1 and Atom2), Bond orders (BOs) and KBOs (kcal/mol) for H-bonds in (EAN)<sub>16</sub> IL clusters. Atom numbers in Atom1 and Atom2 are labeled in Figure 2h. *R* represents the H-bond distance in Å. Occ(Atom1) and Occ(Atom2) are occupations of the QUAOs centered on Atom1 and Atom2, respectively. Orbital (Atom1) and Orbital (Atom2) are types of orbitals in Atom1 and Atom2 participating in the H-bonding interactions, respectively. The KBOs in parentheses is the sum of the H-bond and N<sup>···</sup>O KBOs.

| System              | Atom1 | Atom2 | BO            | KBO<br>(kcal/mol) | R<br>(Å) | Occ<br>(Atom1) | Orbital<br>(Atom 1) | Occ<br>(Atom2) | Orbital<br>(Atom2) |
|---------------------|-------|-------|---------------|-------------------|----------|----------------|---------------------|----------------|--------------------|
| (EAN) <sub>16</sub> | O112  | H110  | 0.31          | -5.25 (-6.99)     | 1.75     | 1.91           | <i>pl</i>           | 0.62           | $\sigma$           |
|                     | O102  | H95   | 0.30          | -5.19 (-6.91)     | 1.75     | 1.91           | <i>pl</i>           | 0.63           | $\sigma$           |
|                     | O237  | H230  | 0.30          | -5.03 (-6.71)     | 1.75     | 1.92           | <i>pl</i>           | 0.63           | $\sigma$           |
|                     | O147  | H140  | 0.30          | -4.96 (-6.55)     | 1.75     | 1.92           | <i>pl</i>           | 0.62           | $\sigma$           |
|                     | O222  | H215  | 0.29          | -4.96 (-6.56)     | 1.75     | 1.92           | <i>pl</i>           | 0.62           | $\sigma$           |
|                     | O132  | H125  | 0.29          | -4.93 (-6.50)     | 1.75     | 1.92           | <i>pl</i>           | 0.61           | $\sigma$           |
|                     | O12   | H5    | 0.29          | -4.86 (-6.44)     | 1.75     | 1.92           | <i>pl</i>           | 0.62           | $\sigma$           |
|                     | O177  | H170  | 0.28          | -4.77 (-6.30)     | 1.75     | 1.92           | <i>pl</i>           | 0.62           | $\sigma$           |
|                     | O192  | H185  | 0.28          | -4.66 (-6.17)     | 1.75     | 1.92           | <i>pl</i>           | 0.63           | $\sigma$           |
|                     | O 87  | H80   | 0.28          | -4.76 (-4.65)     | 1.75     | 1.93           | <i>pl</i>           | 0.62           | $\sigma$           |
|                     | O 57  | H50   | 0.28          | -4.67 (-6.18)     | 1.75     | 1.93           | <i>pl</i>           | 0.62           | $\sigma$           |
|                     | O 42  | H35   | 0.28          | -4.61 (-4.65)     | 1.75     | 1.92           | <i>pl</i>           | 0.64           | $\sigma$           |
|                     | O 27  | H20   | 0.28          | -4.67 (-6.18)     | 1.75     | 1.93           | <i>pl</i>           | 0.63           | $\sigma$           |
|                     | O 72  | H65   | 0.27          | -4.58 (-6.09)     | 1.75     | 1.93           | <i>pl</i>           | 0.63           | $\sigma$           |
|                     | O207  | H200  | 0.27          | -4.55 (-6.06)     | 1.75     | 1.93           | <i>pl</i>           | 0.62           | $\sigma$           |
|                     | O162  | H155  | 0.27          | -4.55 (-6.06)     | 1.75     | 1.93           | <i>pl</i>           | 0.63           | $\sigma$           |
|                     | H231  | O207  | 0.27          | -4.22 (-5.69)     | 1.75     | 0.63           | $\sigma$            | 1.93           | <i>pl</i>          |
|                     | H 96  | O74   | 0.24          | -3.21 (-4.34)     | 1.77     | 0.63           | $\sigma$            | 1.94           | <i>pl</i>          |
|                     | H186  | O162  | 0.22          | -2.98 (-4.13)     | 1.85     | 0.64           | $\sigma$            | 1.95           | <i>pl</i>          |
|                     | H 81  | O57   | 0.22          | -2.71 (-3.68)     | 1.86     | 0.65           | $\sigma$            | 1.95           | <i>pl</i>          |
|                     | H66   | O27   | 0.18          | -1.99 (-2.75)     | 1.89     | 0.64           | $\sigma$            | 1.96           | <i>pl</i>          |
|                     | H171  | O147  | 0.22          | -2.82 (-3.93)     | 1.89     | 0.64           | $\sigma$            | 1.96           | <i>pl</i>          |
|                     | H201  | O177  | 0.14          | -1.16 (-1.49)     | 1.89     | 0.66           | $\sigma$            | 1.81           | <i>pl</i>          |
|                     | H112  | O102  | 0.16          | -1.40 (-1.98)     | 1.92     | 0.65           | $\sigma$            | 1.96           | <i>pl</i>          |
| H7                  | O44   | 0.13  | -1.16 (-1.63) | 2.02              | 0.67     | $\sigma$       | 1.98                | <i>pl</i>      |                    |
| H 21                | O14   | 0.13  | -1.01 (-1.37) | 2.04              | 0.66     | $\sigma$       | 1.94                | <i>pl</i>      |                    |
| H185                | O225  | 0.11  | -1.06 (-1.53) | 2.04              | 0.65     | $\sigma$       | 1.96                | <i>sl</i>      |                    |
| H187                | O59   | 0.12  | -1.09 (-1.55) | 2.04              | 0.67     | $\sigma$       | 1.98                | <i>pl</i>      |                    |

### 3. List of unique QUAOs for the $N\cdots O$ interactions

**Table S3.1.** Atoms participating in bonding interactions (Atom1 and Atom2), bond orders (BO), KBOs (kcal/mol) of the  $N\cdots O$  interactions in (EAN)<sub>n</sub> (n=1-8). Atom numbers in Atom1 and Atom2 are labeled in Figure 2a through Figure 2e. The  $N\cdots O$  distances ( $R$ ) are in Å. Occ(Atom1) and Occ(Atom2) are occupations of the QUAOs centered on Atom1 and Atom2, respectively.

| System             | Atom1 | Atom2 | BO    | KBO<br>(kcal/mol) | R(Å) | Occ<br>(Atom1) | Occ<br>(Atom2) |
|--------------------|-------|-------|-------|-------------------|------|----------------|----------------|
| (EAN) <sub>1</sub> | O12   | N4    | 0.20  | -1.86             | 2.58 | 1.91           | 1.46           |
|                    | O12   | N4    | 0.06  | -0.17             | 2.58 | 1.82           | 1.46           |
| (EAN) <sub>2</sub> | O12   | N4    | 0.19  | -1.72             | 2.70 | 1.92           | 1.44           |
|                    | O27   | N19   | 0.18  | -1.57             | 2.70 | 1.92           | 1.46           |
|                    | O27   | N4    | 0.15  | -1.02             | 2.69 | 1.95           | 1.41           |
|                    | O15   | N19   | 0.07  | -0.26             | 2.63 | 1.98           | 1.46           |
| (EAN) <sub>4</sub> | O42   | N34   | 0.19  | -1.73             | 2.70 | 1.91           | 1.44           |
|                    | O57   | N49   | 0.19  | -1.65             | 2.70 | 1.92           | 1.43           |
|                    | O27   | N19   | 0.18  | -1.66             | 2.70 | 1.92           | 1.45           |
|                    | N19   | O12   | 0.17  | -1.67             | 2.65 | 1.44           | 1.94           |
|                    | O12   | N4    | 0.18  | -1.61             | 2.71 | 1.93           | 1.42           |
|                    | N49   | O30   | 0.15  | -1.01             | 2.79 | 1.39           | 1.90           |
|                    | O44   | N4    | 0.09  | -0.86             | 2.79 | 1.37           | 1.37           |
| (EAN) <sub>6</sub> | O72   | N64   | 0.19  | -1.71             | 2.70 | 1.91           | 1.44           |
|                    | O87   | N79   | 0.19  | -1.67             | 2.70 | 1.92           | 1.43           |
|                    | O42   | N34   | 0.18  | -1.61             | 2.70 | 1.92           | 1.45           |
|                    | O12   | N4    | 0.18  | -1.54             | 2.70 | 1.93           | 1.44           |
|                    | O27   | N19   | 0.17  | -1.45             | 2.69 | 1.93           | 1.43           |
|                    | O57   | N49   | 0.17  | -1.50             | 2.70 | 1.93           | 1.42           |
|                    | O89   | N64   | 0.15  | -1.16             | 2.71 | 1.90           | 1.41           |
|                    | N79   | O57   | 0.15  | -1.01             | 2.68 | 1.42           | 1.94           |
|                    | N49   | O29   | 0.14  | -1.02             | 2.86 | 1.40           | 1.91           |
| (EAN) <sub>8</sub> | O117  | N109  | 0.19  | -1.70             | 2.70 | 1.92           | 1.44           |
|                    | O102  | N94   | 0.19  | -1.70             | 2.70 | 1.92           | 1.44           |
|                    | O42   | N34   | 0.18  | -1.58             | 2.70 | 1.92           | 1.46           |
|                    | O12   | N4    | 0.18  | -1.58             | 2.70 | 1.92           | 1.45           |
|                    | O87   | N79   | 0.17  | -1.52             | 2.70 | 1.93           | 1.44           |
|                    | O27   | N19   | 0.17  | -1.51             | 2.69 | 1.93           | 1.43           |
|                    | O57   | N49   | 0.17  | -1.50             | 2.70 | 1.93           | 1.44           |
|                    | O72   | N64   | 0.17  | -1.51             | 2.70 | 1.93           | 1.43           |
|                    | N94   | O72   | 0.15  | -1.11             | 2.68 | 1.42           | 1.94           |
|                    | N19   | O12   | 0.15  | -1.05             | 2.69 | 1.41           | 1.94           |
|                    | N49   | O42   | 0.13  | -0.87             | 2.81 | 1.37           | 1.96           |
|                    | N109  | O87   | 0.13  | -0.83             | 2.82 | 1.37           | 1.96           |
|                    | N64   | O27   | 0.12  | -0.77             | 2.70 | 1.39           | 1.96           |
|                    | N49   | O29   | 0.12  | -0.70             | 2.90 | 1.37           | 1.90           |
|                    | N79   | O57   | 0.12  | -0.47             | 2.89 | 1.36           | 1.90           |
|                    | N109  | O104  | 0.11  | -0.47             | 2.83 | 1.36           | 1.90           |
| N109               | O104  | 0.09  | -0.44 | 2.83              | 1.36 | 1.98           |                |



**Table S3.2.** Atoms participating in bonding interactions (Atom1 and Atom2), bond orders (BO), KBOs (kcal/mol) of the  $N\cdots O$  interactions in (EAN)<sub>10</sub>. Atom numbers in Atom1 and Atom2 are labeled in Figure 2f. The  $N\cdots O$  distances ( $R$ ) are in Å. Occ (Atom1) and Occ (Atom2) are occupations of the QUAOs centered on Atom1 and Atom2, respectively.

| System              | Atom1 | Atom2 | BO    | KBO<br>(kcal/mol) | R(Å) | Occ<br>(Atom1) | Occ<br>(Atom2) |
|---------------------|-------|-------|-------|-------------------|------|----------------|----------------|
| (EAN) <sub>10</sub> | O147  | N139  | 0.20  | -1.80             | 2.70 | 1.91           | 1.46           |
|                     | O132  | N124  | 0.20  | -1.78             | 2.70 | 1.91           | 1.45           |
|                     | O42   | N34   | 0.18  | -1.60             | 2.70 | 1.92           | 1.46           |
|                     | O117  | N109  | 0.18  | -1.56             | 2.70 | 1.92           | 1.45           |
|                     | O27   | N19   | 0.18  | -1.53             | 2.68 | 1.93           | 1.44           |
|                     | O87   | N79   | 0.18  | -1.53             | 2.69 | 1.93           | 1.44           |
|                     | O12   | N4    | 0.18  | -1.53             | 2.70 | 1.93           | 1.43           |
|                     | O72   | N64   | 0.18  | -1.55             | 2.70 | 1.93           | 1.42           |
|                     | O57   | N49   | 0.17  | -1.53             | 2.68 | 1.93           | 1.43           |
|                     | O102  | N94   | 0.17  | -1.51             | 2.70 | 1.93           | 1.44           |
|                     | N19   | O12   | 0.15  | -1.47             | 2.70 | 1.41           | 1.95           |
|                     | N79   | O57   | 0.15  | -1.09             | 2.89 | 1.40           | 1.94           |
|                     | N124  | O102  | 0.15  | -1.05             | 2.83 | 1.41           | 1.95           |
|                     | N49   | O30   | 0.15  | -0.99             | 2.83 | 1.38           | 1.91           |
|                     | N49   | O42   | 0.15  | -1.03             | 2.89 | 1.39           | 1.95           |
|                     | N94   | O72   | 0.14  | -0.89             | 2.90 | 1.41           | 1.95           |
|                     | N109  | O105  | 0.10  | -0.41             | 2.89 | 1.36           | 1.91           |
|                     | O44   | N4    | 0.09  | -0.50             | 2.90 | 1.98           | 1.35           |
| O150                | N4    | 0.08  | -0.37 | 2.89              | 1.98 | 1.38           |                |

**Table S3.3.** Atoms participating in bonding interactions (Atom1 and Atom2), bond orders (BO), KBOs (kcal/mol) of the  $N\cdots O$  interactions in (EAN)<sub>12</sub>. Atom numbers in Atom1 and Atom2 are labeled in Figure 2g. The  $N\cdots O$  distances ( $R$ ) are in Å. Occ (Atom1) and Occ (Atom2) are occupations of the QUAOs centered on Atom1 and Atom2, respectively.

| System              | Atom1 | Atom2 | BO    | KBO<br>(kcal/mol) | R(Å) | Occ<br>(Atom1) | Occ<br>(Atom2) |
|---------------------|-------|-------|-------|-------------------|------|----------------|----------------|
| (EAN) <sub>12</sub> | O177  | N169  | 0.20  | -1.84             | 2.70 | 1.91           | 1.46           |
|                     | O132  | N124  | 0.19  | -1.66             | 2.70 | 1.92           | 1.44           |
|                     | O162  | N154  | 0.19  | -1.65             | 2.68 | 1.92           | 1.44           |
|                     | O72   | N64   | 0.18  | -1.61             | 2.70 | 1.92           | 1.44           |
|                     | O102  | N94   | 0.18  | -1.58             | 2.70 | 1.92           | 1.45           |
|                     | O12   | N4    | 0.18  | -1.52             | 2.68 | 1.92           | 1.46           |
|                     | O87   | N79   | 0.18  | -1.53             | 2.70 | 1.92           | 1.46           |
|                     | O42   | N34   | 0.18  | -1.59             | 2.70 | 1.92           | 1.43           |
|                     | O117  | N109  | 0.18  | -1.59             | 2.70 | 1.92           | 1.44           |
|                     | O27   | N19   | 0.17  | -1.47             | 2.83 | 1.92           | 1.46           |
|                     | N154  | O14   | 0.16  | -1.38             | 2.83 | 1.42           | 1.92           |
|                     | N139  | O117  | 0.15  | -1.30             | 2.90 | 1.41           | 1.94           |
|                     | O150  | N124  | 0.13  | -0.81             | 2.89 | 1.91           | 1.39           |
|                     | N169  | O45   | 0.12  | -0.65             | 2.83 | 1.36           | 1.91           |
|                     | N79   | O57   | 0.11  | -0.59             | 2.83 | 1.37           | 1.96           |
|                     | N139  | O104  | 0.10  | -0.44             | 2.90 | 1.39           | 1.91           |
|                     | N94   | O42   | 0.09  | -0.39             | 2.90 | 1.35           | 1.97           |
|                     | N139  | O102  | 0.08  | -0.25             | 2.89 | 1.39           | 1.97           |
|                     | N94   | O44   | 0.08  | -0.39             | 2.90 | 1.37           | 1.98           |
|                     | O135  | N109  | 0.08  | -0.42             | 2.86 | 1.98           | 1.35           |
| N139                | O104  | 0.08  | -0.37 | 2.91              | 1.39 | 1.98           |                |
| N109                | O72   | 0.07  | -0.33 | 2.90              | 1.40 | 1.98           |                |

**Table S3.4.** Atoms participating in bonding interactions (Atom1 and Atom2), bond orders (BO), KBOs (kcal/mol) of the  $N\cdots O$  interactions in (EAN)<sub>16</sub>. Atom numbers in Atom1 and Atom2 are labeled in Figure 2h. The  $N\cdots O$  distances ( $R$ ) are in Å. Occ (Atom1) and Occ (Atom2) are occupations of the QUAOs centered on Atom1 and Atom2, respectively.

| System              | Atom1 | Atom2 | BO    | KBO<br>(kcal/mol) | R(Å) | Occ<br>(Atom1) | Occ<br>(Atom2) |
|---------------------|-------|-------|-------|-------------------|------|----------------|----------------|
| (EAN) <sub>16</sub> | O 12  | N4    | 0.19  | -1.65             | 2.70 | 1.91           | 1.45           |
|                     | O237  | N229  | 0.19  | -1.69             | 2.70 | 1.92           | 1.44           |
|                     | O102  | N94   | 0.19  | -1.69             | 2.68 | 1.92           | 1.44           |
|                     | O42   | N34   | 0.19  | -1.65             | 2.70 | 1.92           | 1.45           |
|                     | O147  | N139  | 0.18  | -1.63             | 2.70 | 1.92           | 1.45           |
|                     | O222  | N214  | 0.18  | -1.59             | 2.68 | 1.92           | 1.43           |
|                     | O117  | N109  | 0.18  | -1.58             | 2.70 | 1.92           | 1.42           |
|                     | O27   | N19   | 0.18  | -1.53             | 2.70 | 1.92           | 1.45           |
|                     | O162  | N154  | 0.18  | -1.56             | 2.68 | 1.93           | 1.44           |
|                     | O132  | N124  | 0.17  | -1.50             | 2.70 | 1.92           | 1.46           |
|                     | O72   | N64   | 0.18  | -1.61             | 2.70 | 1.92           | 1.46           |
|                     | O192  | N184  | 0.18  | -1.52             | 2.68 | 1.92           | 1.42           |
|                     | O87   | N79   | 0.18  | -1.55             | 2.70 | 1.93           | 1.44           |
|                     | O177  | N169  | 0.18  | -1.50             | 2.70 | 1.93           | 1.43           |
|                     | N229  | O207  | 0.18  | -1.47             | 2.70 | 1.44           | 1.44           |
|                     | O57   | N49   | 0.17  | -1.45             | 2.70 | 1.93           | 1.43           |
|                     | N94   | O74   | 0.17  | -1.48             | 2.80 | 1.43           | 1.90           |
|                     | N184  | O162  | 0.15  | -1.15             | 2.85 | 1.40           | 1.95           |
|                     | N169  | O147  | 0.15  | -1.11             | 2.89 | 1.40           | 1.95           |
|                     | N79   | O57   | 0.14  | -0.97             | 2.83 | 1.41           | 1.95           |
| N199                | O177  | 0.13  | -0.83 | 2.90              | 1.39 | 1.96           |                |
| N64                 | O27   | 0.12  | -0.73 | 2.89              | 1.40 | 1.96           |                |
| N109                | O102  | 0.11  | -0.58 | 2.83              | 1.39 | 1.96           |                |

4. List of unique QUAOs for the (EAN)<sub>1</sub>:(1-AT)<sub>n</sub> (n=1-5)

**Table S4.1.** Average Bond orders, KBOs (kcal/mol) of the N<sup>···</sup>O interactions for (EAN)<sub>1</sub>:(1-AT)<sub>n</sub> (n=1 – 5 ). N<sup>···</sup>O distances ( $R_{NO}$ ) are in Å for (EAN)<sub>1</sub>:(1-AT)<sub>n</sub> (n=1 – 5 ).

| Systems                                 | $R_{NO}$ (Å) | BO   | KBO (kcal/mol) |
|-----------------------------------------|--------------|------|----------------|
| (EAN) <sub>1</sub> :(1-AT) <sub>1</sub> | 2.75         | 0.15 | -1.74          |
| (EAN) <sub>1</sub> :(1-AT) <sub>2</sub> | 2.80         | 0.15 | -1.70          |
| (EAN) <sub>1</sub> :(1-AT) <sub>3</sub> | 2.82         | 0.12 | -1.64          |
| (EAN) <sub>1</sub> :(1-AT) <sub>4</sub> | 2.82         | 0.12 | -1.67          |
| (EAN) <sub>1</sub> :(1-AT) <sub>5</sub> | 2.85         | 0.11 | -1.68          |

**Table S4.2.** Average Bond orders, KBOs (kcal/mol) of the Ethylammonium N<sup>···</sup>N (1-AT) interactions for (EAN)<sub>1</sub>:(1-AT)<sub>n</sub> (n=1 – 5 ). Ethylammonium N<sup>···</sup>N (1-AT) distances ( $R_{NN}$ ) are in Å

| Systems                                 | $R_{NN}$ (Å) | BO   | KBO (kcal/mol) |
|-----------------------------------------|--------------|------|----------------|
| (EAN) <sub>1</sub> :(1-AT) <sub>1</sub> | 2.74         | 0.07 | -0.18          |
| (EAN) <sub>1</sub> :(1-AT) <sub>2</sub> | 2.98         | 0.10 | -0.42          |
| (EAN) <sub>1</sub> :(1-AT) <sub>3</sub> | -            | -    | -              |
| (EAN) <sub>1</sub> :(1-AT) <sub>4</sub> | 2.86         | 0.13 | -0.76          |
| (EAN) <sub>1</sub> :(1-AT) <sub>5</sub> | 2.80         | 0.19 | -1.46          |

**Table S4.3.** Atoms participating in bonding interactions (Atom1 and Atom2), bond orders (BO), KBOs (kcal/mol) for the H-bonds in (EAN)<sub>1</sub>:(1-AT)<sub>n</sub> (n=1-5). Atom numbers in Atom1 and Atom2 are labeled in Figure 3. R represents the H-bond distance in Å. Occ (Atom1) and Occ (Atom 2) are occupations of the QUAOs centered on Atom1 and Atom2, respectively. Orbital (Atom1) and Orbital (Atom2) are types of orbitals in Atom1 and Atom2 participating in the H-bonding interactions, respectively. The KBO in parentheses is the sum of H-bonding interactions with N<sup>···</sup>O and N<sup>···</sup>N KBO.

| System                                  | Atom1 | Atom2 | BO   | KBO (kcal/mol) | R (Å) | Occ (Atom1) | Orbital (Atom 1) | Occ (Atom2) | Orbital (Atom2) |
|-----------------------------------------|-------|-------|------|----------------|-------|-------------|------------------|-------------|-----------------|
| (EAN) <sub>1</sub> :(1-AT) <sub>1</sub> | O12   | H5    | 0.33 | -5.11 (-6.77)  | 1.82  | 1.92        | <i>pl</i>        | 0.61        | $\sigma$        |
|                                         | H22   | O12   | 0.10 | -1.91 (-2.73)  | 2.14  | 0.67        | $\sigma$         | 1.96        | <i>pl</i>       |
|                                         | N17   | H5    | 0.11 | -0.69 (-0.87)  | 2.17  | 1.99        | <i>pl</i>        | 0.61        | $\sigma$        |
| (EAN) <sub>1</sub> :(1-AT) <sub>2</sub> | O12   | H5    | 0.30 | -5.13 (-6.83)  | 1.75  | 1.92        | <i>pl</i>        | 0.62        | $\sigma$        |
|                                         | H32   | O14   | 0.16 | -1.77 (-2.41)  | 1.98  | 0.69        | $\sigma$         | 1.90        | <i>pl</i>       |
|                                         | N18   | H6    | 0.15 | -0.98 (-1.40)  | 2.22  | 1.94        | <i>pl</i>        | 0.65        | $\sigma$        |
| (EAN) <sub>1</sub> :(1-AT) <sub>3</sub> | O12   | H5    | 0.30 | -5.06 (-6.74)  | 1.75  | 1.92        | <i>pl</i>        | 0.62        | $\sigma$        |
|                                         | H32   | O15   | 0.17 | -1.91 (-2.65)  | 1.99  | 0.69        | $\sigma$         | 1.91        | <i>pl</i>       |
|                                         | H42   | N18   | 0.18 | -1.67 (-2.37)  | 2.09  | 0.70        | $\sigma$         | 1.93        | <i>pl</i>       |
|                                         | H22   | O12   | 0.13 | -0.97 (-1.45)  | 2.09  | 0.69        | $\sigma$         | 1.97        | <i>pl</i>       |
|                                         | H22   | O12   | 0.11 | -0.74 (-0.96)  | 2.09  | 0.69        | $\sigma$         | 1.82        | <i>pl</i>       |
| (EAN) <sub>1</sub> :(1-AT) <sub>4</sub> | O12   | H5    | 0.27 | -4.60 (-6.12)  | 1.75  | 1.93        | <i>pl</i>        | 0.63        | $\sigma$        |
|                                         | N48   | H6    | 0.27 | -3.80 (-5.14)  | 1.87  | 1.91        | <i>pl</i>        | 0.65        | $\sigma$        |
|                                         | H22   | O12   | 0.15 | -1.41 (-2.02)  | 2.03  | 0.69        | $\sigma$         | 1.95        | <i>pl</i>       |
|                                         | H33   | O12   | 0.13 | -0.97 (-1.37)  | 2.06  | 0.69        | $\sigma$         | 1.95        | <i>pl</i>       |
|                                         | N17   | H5    | 0.11 | -0.76 (-0.95)  | 2.17  | 1.96        | <i>pl</i>        | 0.63        | $\sigma$        |
| (EAN) <sub>1</sub> :(1-AT) <sub>5</sub> | O12   | H5    | 0.27 | -4.63 (-6.14)  | 1.75  | 1.93        | <i>pl</i>        | 0.63        | $\sigma$        |
|                                         | N48   | H6    | 0.29 | -4.11 (-5.57)  | 1.86  | 1.90        | <i>pl</i>        | 0.66        | $\sigma$        |
|                                         | H22   | O12   | 0.15 | -1.31 (-1.88)  | 2.03  | 0.69        | $\sigma$         | 1.96        | <i>pl</i>       |
|                                         | H33   | O14   | 0.11 | -0.81 (-1.09)  | 2.09  | 0.70        | $\sigma$         | 1.91        | <i>pl</i>       |
|                                         | H42   | O15   | 0.10 | -0.66 (-0.24)  | 2.09  | 0.69        | $\sigma$         | 1.92        | <i>pl</i>       |

5. List of unique QUAOs for the  $(\text{EAN})_2:(1\text{-AT})_n$  ( $n=1-5$ )

**Table S5.1.** Average Bond orders and KBOs (kcal/mol) of the Ethylammonium  $\text{N}^{\cdots}\text{O}$  (Nitrate) interactions for  $(\text{EAN})_2:(1\text{-AT})_n$  ( $n = 1 - 5$ ). The Ethylammonium  $\text{N}^{\cdots}\text{O}$  (Nitrate) distances ( $R_{NO}$ ) are in Å

| Systems                          | $R_{NO}$ (Å) | BO   | KBO (kcal/mol) |
|----------------------------------|--------------|------|----------------|
| $(\text{EAN})_2:(1\text{-AT})_1$ | 2.70         | 0.18 | -1.63          |
| $(\text{EAN})_2:(1\text{-AT})_2$ | 2.70         | 0.15 | -1.20          |
| $(\text{EAN})_2:(1\text{-AT})_3$ | 2.74         | 0.15 | -1.19          |
| $(\text{EAN})_2:(1\text{-AT})_4$ | 2.74         | 0.13 | -0.98          |
| $(\text{EAN})_2:(1\text{-AT})_5$ | 2.78         | 0.12 | -0.96          |

**Table S5.2.** Average Bond orders and KBOs (kcal/mol) of the 1-AT  $\text{N}^{\cdots}\text{O}$  (Nitrate) interactions for  $(\text{EAN})_2:(1\text{-AT})_n$  ( $n = 1 - 5$ ). 1-AT  $\text{N}^{\cdots}\text{O}$  (Nitrate) distances ( $R_{NO}$ ) are in Å

| Systems                          | $R_{NO}$ (Å) | BO   | KBO (kcal/mol) |
|----------------------------------|--------------|------|----------------|
| $(\text{EAN})_2:(1\text{-AT})_1$ | 2.95         | 0.10 | -0.49          |
| $(\text{EAN})_2:(1\text{-AT})_2$ | 2.95         | 0.10 | -0.51          |
| $(\text{EAN})_2:(1\text{-AT})_3$ | 2.96         | 0.10 | -0.56          |
| $(\text{EAN})_2:(1\text{-AT})_4$ | 2.97         | 0.11 | -0.61          |
| $(\text{EAN})_2:(1\text{-AT})_5$ | 2.98         | 0.10 | -0.63          |

**Table S5.3.** Average Bond orders and KBOs (kcal/mol) of the Ethylammonium  $\text{N}^{\cdots}\text{N}$  (1-AT) interactions for  $(\text{EAN})_2:(1\text{-AT})_n$  ( $n = 1 - 5$ ). Ethylammonium  $\text{N}^{\cdots}\text{N}$  (1-AT) distances ( $R_{NN}$ ) are in Å.

| Systems                          | $R_{NN}$ (Å) | BO   | KBO (kcal/mol) |
|----------------------------------|--------------|------|----------------|
| $(\text{EAN})_2:(1\text{-AT})_1$ | 2.99         | 0.11 | -0.45          |
| $(\text{EAN})_2:(1\text{-AT})_2$ | 2.97         | 0.13 | -0.32          |
| $(\text{EAN})_2:(1\text{-AT})_3$ | 3.02         | 0.10 | -0.39          |
| $(\text{EAN})_2:(1\text{-AT})_4$ | 3.02         | 0.12 | -0.70          |
| $(\text{EAN})_2:(1\text{-AT})_5$ | 2.93         | 0.16 | -1.07          |

**Table S5.4.** Atoms participating in bonding interactions (Atom1 and Atom2), bond orders (BO), KBOs (kcal/mol) for the H-bonds in  $(\text{EAN})_2:(1\text{-AT})_n$  ( $n=1\text{-}5$ ). Atom numbers in Atom1 and Atom2 are labeled in Figure 4. R represents the H-bond distance in Å. Occ (Atom1) and Occ (Atom2) are occupations of the QUAOs centered on Atom1 and Atom2, respectively. Orbital (Atom1) and Orbital (Atom2) are types of orbitals in Atom1 and Atom2 participating in the H-bonding interactions, respectively. The KBO in parentheses is the sum of H-bonding interactions with  $N\cdots O$  and  $N\cdots N$  KBOs.

| System                           | Atom1 | Atom2 | BO   | KBO<br>(kcal/mol) | R<br>(Å) | Occ<br>(Atom1) | Orbital<br>(Atom1) | Occ<br>(Atom2) | Orbital<br>(Atom2) |
|----------------------------------|-------|-------|------|-------------------|----------|----------------|--------------------|----------------|--------------------|
| $(\text{EAN})_2:(1\text{-AT})_1$ | O 12  | H 5   | 0.29 | -5.04 (-6.67)     | 1.75     | 1.92           | <i>pl</i>          | 0.61           | $\sigma$           |
|                                  | O 27  | H 20  | 0.29 | -4.99 (-6.62)     | 1.75     | 1.92           | <i>pl</i>          | 0.62           | $\sigma$           |
|                                  | N 33  | H 22  | 0.15 | -1.03 (-1.49)     | 2.13     | 1.94           | <i>pl</i>          | 0.66           | $\sigma$           |
|                                  | H 37  | O 12  | 0.14 | -1.17 (-1.66)     | 2.17     | 0.68           | $\sigma$           | 1.97           | <i>pl</i>          |
|                                  | O 29  | H 7   | 0.12 | -0.82 (-1.21)     | 2.68     | 1.98           | <i>pl</i>          | 0.65           | $\sigma$           |
| $(\text{EAN})_2:(1\text{-AT})_2$ | O12   | H5    | 0.29 | -5.05 (-6.69)     | 1.75     | 1.92           | <i>pl</i>          | 0.62           | $\sigma$           |
|                                  | O27   | H20   | 0.29 | -4.96 (-6.58)     | 1.75     | 1.92           | <i>pl</i>          | 0.62           | $\sigma$           |
|                                  | N43   | H22   | 0.16 | -1.28 (-1.60)     | 2.09     | 1.94           | <i>pl</i>          | 0.66           | $\sigma$           |
|                                  | O 29  | H 7   | 0.13 | -1.18 (-3.40)     | 1.97     | 1.91           | <i>pl</i>          | 0.66           | $\sigma$           |
|                                  | H47   | O12   | 0.14 | -1.20 (-1.71)     | 2.17     | 0.68           | $\sigma$           | 1.97           | $\sigma$           |
| $(\text{EAN})_2:(1\text{-AT})_3$ | O12   | H5    | 0.29 | -5.09 (-6.75)     | 1.75     | 1.92           | <i>pl</i>          | 0.62           | $\sigma$           |
|                                  | O27   | H20   | 0.28 | -4.63 (-6.16)     | 1.75     | 1.93           | <i>pl</i>          | 0.62           | $\sigma$           |
|                                  | H47   | O12   | 0.15 | -1.32 (-1.88)     | 2.15     | 0.68           | $\sigma$           | 1.97           | <i>pl</i>          |
|                                  | O29   | H7    | 0.14 | -1.25 (-1.62)     | 1.95     | 1.91           | <i>pl</i>          | 0.66           | $\sigma$           |
|                                  | N43   | H22   | 0.14 | -0.90 (-1.30)     | 3.00     | 1.94           | <i>pl</i>          | 0.66           | $\sigma$           |
| $(\text{EAN})_2:(1\text{-AT})_4$ | O12   | H5    | 0.28 | -4.85 (-6.45)     | 1.75     | 1.93           | <i>pl</i>          | 0.63           | $\sigma$           |
|                                  | O27   | H20   | 0.28 | -4.68 (-6.23)     | 1.75     | 1.93           | <i>pl</i>          | 0.62           | $\sigma$           |
|                                  | N62   | H6    | 0.22 | -2.68 (-3.72)     | 2.00     | 1.93           | <i>pl</i>          | 0.67           | $\sigma$           |
|                                  | H47   | O12   | 0.15 | -1.41 (-2.01)     | 2.14     | 1.91           | <i>pl</i>          | 1.97           | $\sigma$           |
|                                  | H67   | O15   | 0.11 | -0.79 (-1.19)     | 2.11     | 0.69           | $\sigma$           | 1.98           | <i>pl</i>          |
|                                  | O29   | H7    | 0.11 | -0.78 (-1.17)     | 1.98     | 0.69           | $\sigma$           | 0.67           | <i>pl</i>          |
|                                  | N43   | H22   | 0.13 | -0.78 (-1.13)     | 2.19     | 1.96           | <i>pl</i>          | 0.66           | $\sigma$           |
| $(\text{EAN})_2:(1\text{-AT})_5$ | O12   | H5    | 0.28 | -4.85 (-6.45)     | 1.75     | 1.92           | <i>pl</i>          | 0.63           | $\sigma$           |
|                                  | O27   | H20   | 0.28 | -4.74 (-6.32)     | 1.92     | 1.92           | <i>pl</i>          | 0.63           | $\sigma$           |
|                                  | N43   | H22   | 0.25 | -3.08 (-4.21)     | 2.03     | 1.92           | <i>pl</i>          | 0.66           | <i>pl</i>          |
|                                  | N76   | H6    | 0.24 | -2.77 (-3.83)     | 2.03     | 1.93           | <i>pl</i>          | 0.67           | <i>pl</i>          |
|                                  | N52   | O21   | 0.20 | -2.66 (-3.69)     | 2.00     | 1.93           | <i>pl</i>          | 0.66           | <i>pl</i>          |
|                                  | H67   | O12   | 0.15 | -1.39 (-2.02)     | 2.03     | 0.69           | $\sigma$           | 1.96           | $\sigma$           |
|                                  | H47   | O14   | 0.14 | -1.15 (-1.19)     | 1.92     | 0.68           | $\sigma$           | 1.98           | <i>sl</i>          |
|                                  | H47   | O14   | 0.13 | -1.18 (-1.51)     | 1.92     | 0.68           | $\sigma$           | 1.91           | <i>pl</i>          |
|                                  | O29   | H7    | 0.13 | -1.11 (-3.34)     | 1.99     | 1.91           | $\sigma$           | 0.66           | $\sigma$           |

List of low energy geometries for (EAN)<sub>n</sub> (n=4,8,10,16,24)

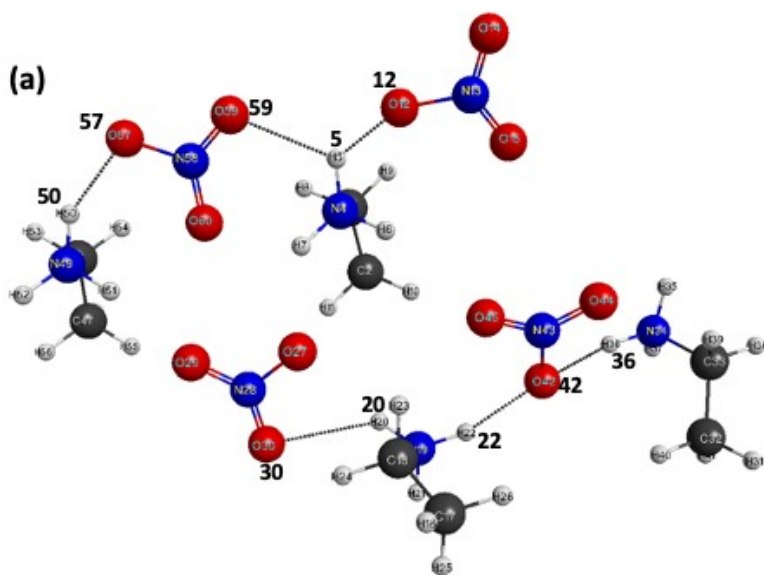

| (EAN) <sub>4</sub> |                         |                              |
|--------------------|-------------------------|------------------------------|
| Bonds              | R <sub>H-bond</sub> (Å) | θ <sub>H-bond</sub> (Degree) |
| H5...O12           | 1.75                    | 155.99                       |
| H5...O59           | 2.22                    | 144.47                       |
| O57...H50          | 1.75                    | 155.99                       |
| O30...H20          | 1.75                    | 155.99                       |
| O42...H36          | 1.75                    | 155.99                       |
| O42...H22          | 1.85                    | 163.66                       |
| <b>Average</b>     | <b>1.86 Å</b>           | <b>155.22 °</b>              |

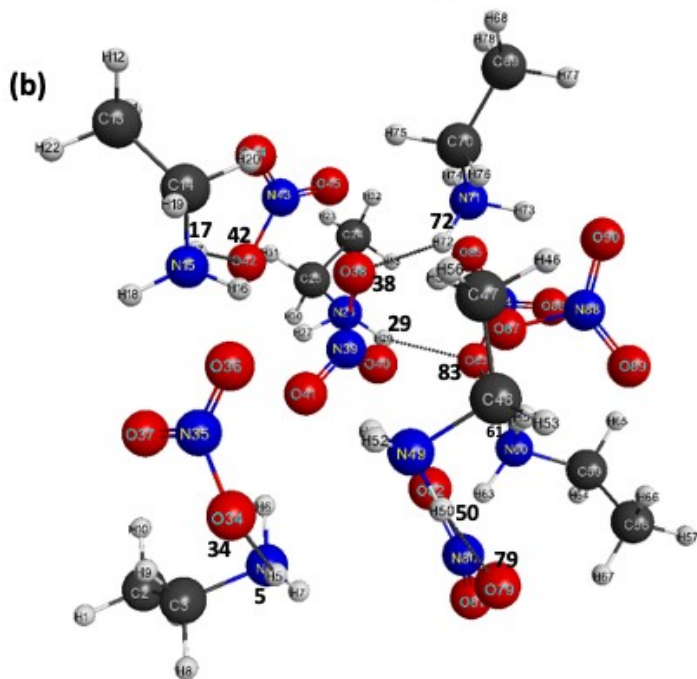

| (EAN) <sub>6</sub> |                         |                              |
|--------------------|-------------------------|------------------------------|
| Bonds              | R <sub>H-bond</sub> (Å) | θ <sub>H-bond</sub> (Degree) |
| H17...O42          | 1.75                    | 155.99                       |
| H5...O34           | 2.22                    | 144.47                       |
| O79...H50          | 1.75                    | 155.99                       |
| O83...H29          | 1.75                    | 155.99                       |
| O38...H72          | 1.75                    | 155.99                       |
| O83...H61          | 1.93                    | 167.43                       |
| <b>Average</b>     | <b>1.86 Å</b>           | <b>155.97 °</b>              |

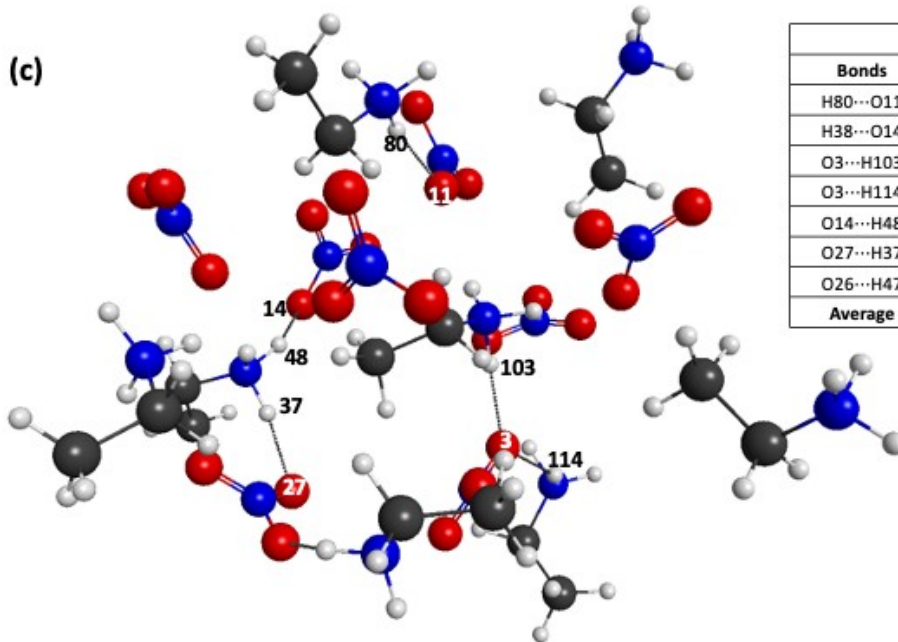

| (EAN) <sub>8</sub> |                         |                              |
|--------------------|-------------------------|------------------------------|
| Bonds              | R <sub>H-bond</sub> (Å) | θ <sub>H-bond</sub> (Degree) |
| H80...O11          | 1.75                    | 155.99                       |
| H38...O14          | 1.75                    | 115.94                       |
| O3...H103          | 1.75                    | 155.99                       |
| O3...H114          | 1.83                    | 140.40                       |
| O14...H48          | 1.75                    | 155.99                       |
| O27...H37          | 1.86                    | 164.38                       |
| O26...H47          | 1.75                    | 155.99                       |
| <b>Average</b>     | <b>1.78 Å</b>           | <b>149.24 °</b>              |

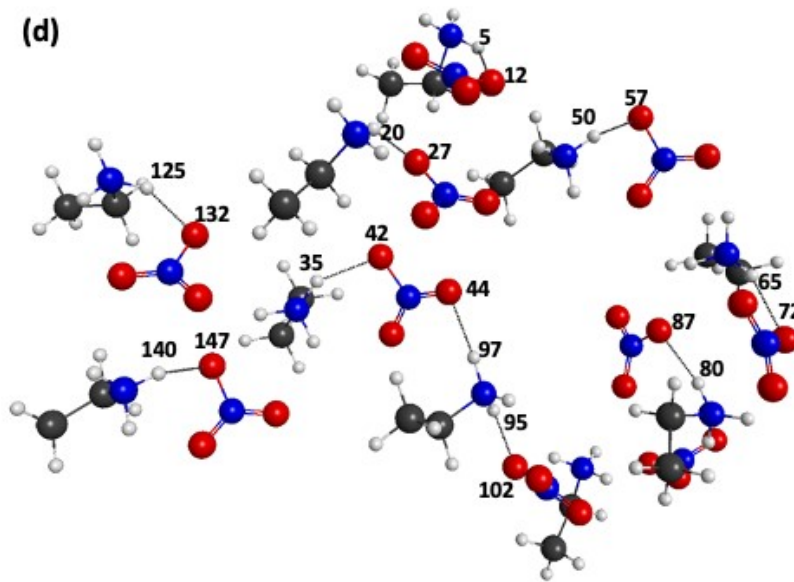

| (EAN) <sub>10</sub> |                         |                              |
|---------------------|-------------------------|------------------------------|
| Bonds               | R <sub>H-bond</sub> (Å) | θ <sub>H-bond</sub> (Degree) |
| H125...O132         | 1.75                    | 155.99                       |
| H140...O147         | 1.75                    | 155.99                       |
| O42...H35           | 1.75                    | 155.99                       |
| O44...H97           | 1.93                    | 169.44                       |
| O27...H20           | 1.75                    | 155.99                       |
| O102...H95          | 1.75                    | 155.99                       |
| O12...H5            | 1.75                    | 155.99                       |
| H5...O12            | 1.75                    | 155.99                       |
| H50...O57           | 1.75                    | 155.99                       |
| H65...O72           | 1.93                    | 155.79                       |
| H80...O87           | 1.83                    | 157.07                       |
| <b>Average</b>      | <b>1.88 Å</b>           | <b>157.29 °</b>              |



(e)

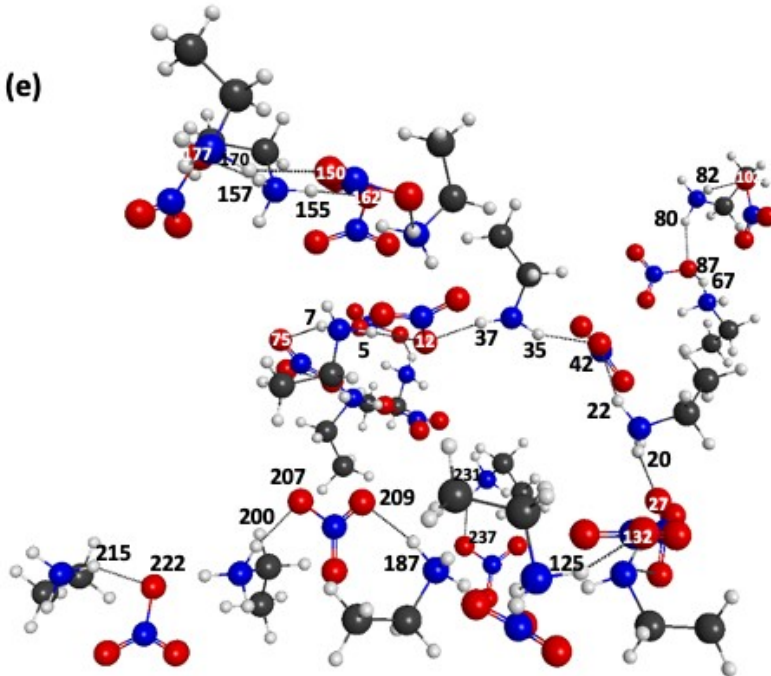

| (EAN) <sub>16</sub> |                         |                              |
|---------------------|-------------------------|------------------------------|
| Bonds               | R <sub>H-bond</sub> (Å) | θ <sub>H-bond</sub> (Degree) |
| H5...O12            | 1.90                    | 149.47                       |
| H75...O147          | 1.75                    | 155.99                       |
| O27...H35           | 1.75                    | 155.99                       |
| O42...H97           | 1.93                    | 169.44                       |
| O42...H20           | 1.75                    | 155.99                       |
| O12...H37           | 1.75                    | 155.99                       |
| O12...H5            | 1.75                    | 155.99                       |
| H5...O12            | 1.75                    | 155.99                       |
| H50...O57           | 1.75                    | 155.99                       |
| H65...O72           | 1.93                    | 155.79                       |
| H67...O87           | 1.78                    | 157.07                       |
| H80...O87           | 1.88                    | 149.52                       |
| H82...O102          | 1.75                    | 152.84                       |
| H80...O87           | 1.88                    | 155.79                       |
| O132...H125         | 1.75                    | 156.22                       |
| O162...H155         | 1.86                    | 162.47                       |
| O157...H177         | 1.85                    | 150.52                       |
| O150...H170         | 1.86                    | 151.70                       |
| O209...H187         | 1.86                    | 167.43                       |
| O207...H200         | 1.87                    | 159.30                       |
| O222...H215         | 1.82                    | 145.67                       |
| O237...H231         | 1.75                    | 155.99                       |
| <b>Average</b>      | <b>1.81Å</b>            | <b>155.96 °</b>              |

(f)

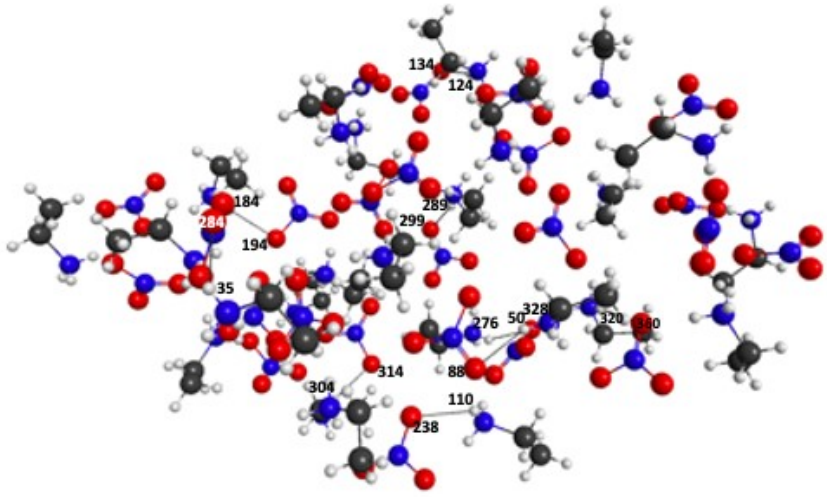

| (EAN) <sub>24</sub> |                         |                              |
|---------------------|-------------------------|------------------------------|
| Bonds               | R <sub>H-bond</sub> (Å) | θ <sub>H-bond</sub> (Degree) |
| O134...H124         | 2.10                    | 164.22                       |
| O284...H35          | 2.01                    | 164.22                       |
| O238...H110         | 1.94                    | 155.99                       |
| O360...H320         | 2.22                    | 112.25                       |
| O314...H304         | 2.07                    | 164.22                       |
| O328...H276         | 1.75                    | 155.99                       |
| O88...H50           | 2.08                    | 148.98                       |
| O299...H289         | 2.10                    | 164.22                       |
| O194...H184         | 2.07                    | 164.22                       |
| <b>Average</b>      | <b>2.04Å</b>            | <b>154.92 °</b>              |

(g)

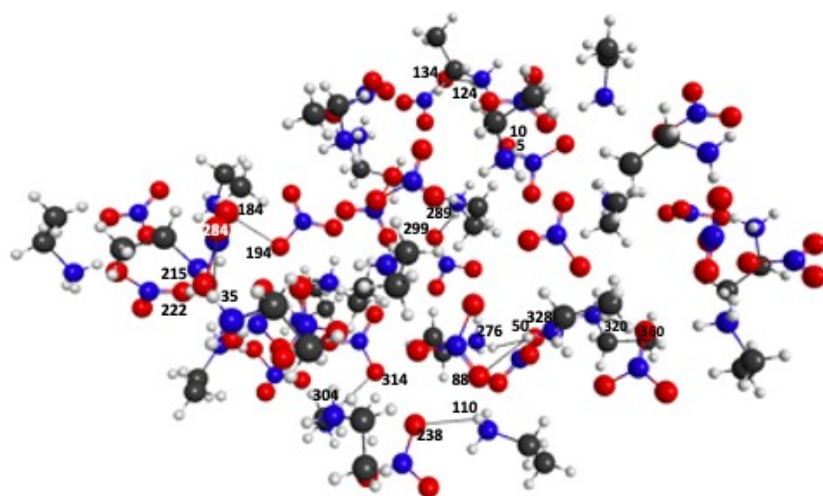

| (EAN) <sub>24</sub> |                         |                              |
|---------------------|-------------------------|------------------------------|
| Bonds               | R <sub>H-bond</sub> (Å) | θ <sub>H-bond</sub> (Degree) |
| O134...H124         | 2.10                    | 164.22                       |
| O284...H35          | 2.01                    | 164.22                       |
| O238...H110         | 1.94                    | 155.99                       |
| O360...H320         | 2.22                    | 112.25                       |
| O314...H304         | 2.07                    | 164.22                       |
| O328...H276         | 1.75                    | 155.99                       |
| O88...H50           | 2.08                    | 148.98                       |
| O299...H289         | 2.10                    | 164.22                       |
| O194...H184         | 2.07                    | 164.22                       |
| O10...H5            | 1.75                    | 155.99                       |
| O222...H215         | 2.10                    | 164.22                       |
| <b>Average</b>      | <b>2.02Å</b>            | <b>155.9°</b>                |

\*Lowest energy geometry

Figure S1. The second lowest energy geometry from EFP MC sampled geometries for (a) (EAN)<sub>4</sub> (b) (EAN)<sub>6</sub>, (c) (EAN)<sub>8</sub>, (d) (EAN)<sub>10</sub> (e) (EAN)<sub>16</sub> (f) (EAN)<sub>24</sub> and EFP MC optimized lowest energy geometry for (g) (EAN)<sub>24</sub>. Atoms that have H-bonding interactions are indicated by atom numbers and listed under “Bonds”. Hydrogen bonds are indicated with dotted lines.  $R_{H-bond}$  represents the distance between a hydrogen atom from [EA]<sup>+</sup> and an oxygen atom from [NO<sub>3</sub>]<sup>-</sup> that form a H-bond. Units are in Å.  $\theta_{H-bond}$  is the angle measured in ethylammonium N-H...O (nitrate).

(a)

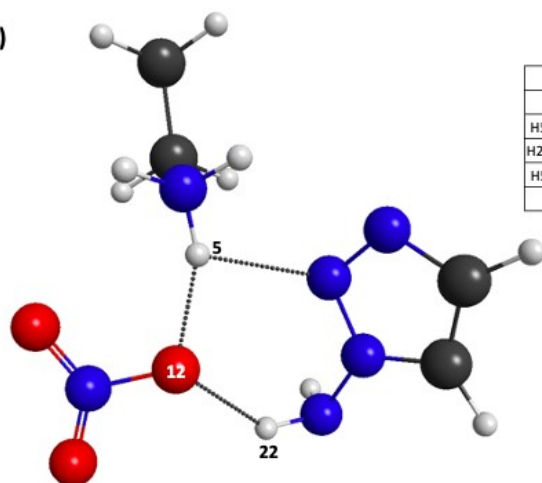

| (EAN) <sub>1</sub> :(1-AT) <sub>1</sub> |                                |                                     |
|-----------------------------------------|--------------------------------|-------------------------------------|
| Bonds                                   | <i>R</i> <sub>H-bond</sub> (Å) | <i>θ</i> <sub>H-bond</sub> (Degree) |
| H5...O12 (sd,da)                        | 1.75                           | 155.99                              |
| H22...O12 (sd,da)                       | 2.02                           | 137.34                              |
| H5...N17 (sd,da)                        | 2.17                           | 89.95                               |
| Average                                 | 1.98 Å                         | 127.76 °                            |

(b)

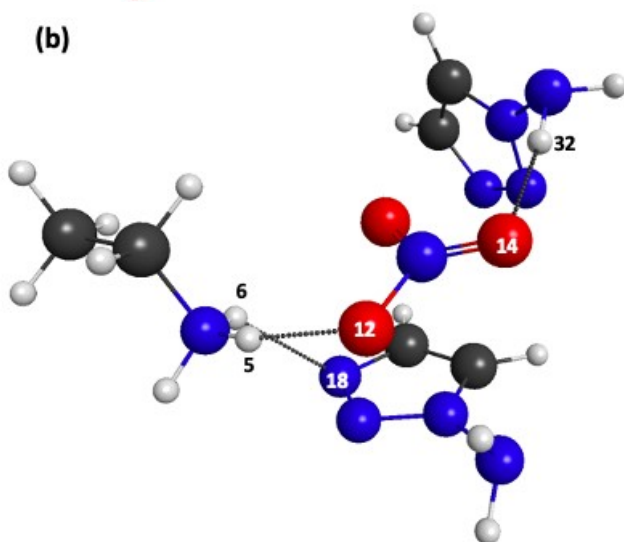

| (EAN) <sub>1</sub> :(1-AT) <sub>2</sub> |                                |                                     |
|-----------------------------------------|--------------------------------|-------------------------------------|
| Bonds                                   | <i>R</i> <sub>H-bond</sub> (Å) | <i>θ</i> <sub>H-bond</sub> (Degree) |
| H5...O12 (dd,sa)                        | 1.75                           | 155.99                              |
| H32...O14 (sd,sa)                       | 1.98                           | 171.99                              |
| H6...N18 (dd,sa)                        | 2.22                           | 130.58                              |
| Average                                 | 1.98 Å                         | 152.85 °                            |

(c)

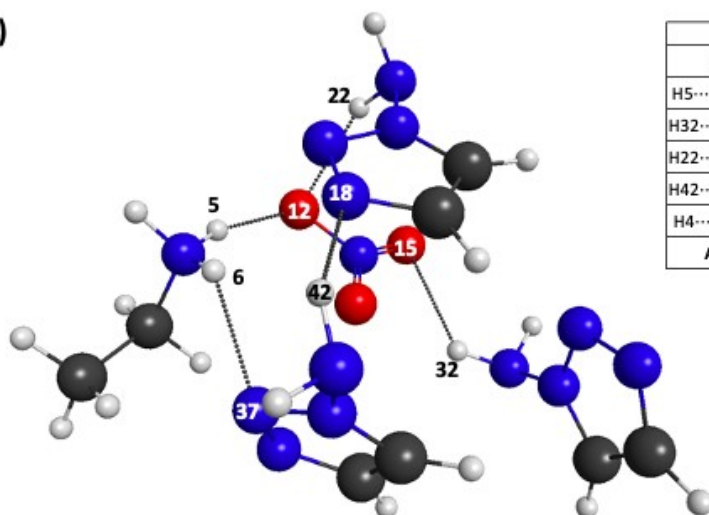

| (EAN) <sub>1</sub> :(1-AT) <sub>3</sub> |                                |                                     |
|-----------------------------------------|--------------------------------|-------------------------------------|
| Bonds                                   | <i>R</i> <sub>H-bond</sub> (Å) | <i>θ</i> <sub>H-bond</sub> (Degree) |
| H5...O12 (dd,da)                        | 1.75                           | 155.99                              |
| H32...O15 (sd,da)                       | 1.99                           | 173.92                              |
| H22...O12 (sd,da)                       | 2.09                           | 135.30                              |
| H42...N18 (sd,da)                       | 2.09                           | 138.07                              |
| H4...N37 (dd,sa)                        | 2.33                           | 134.45                              |
| Average                                 | 2.05 Å                         | 147.55 °                            |

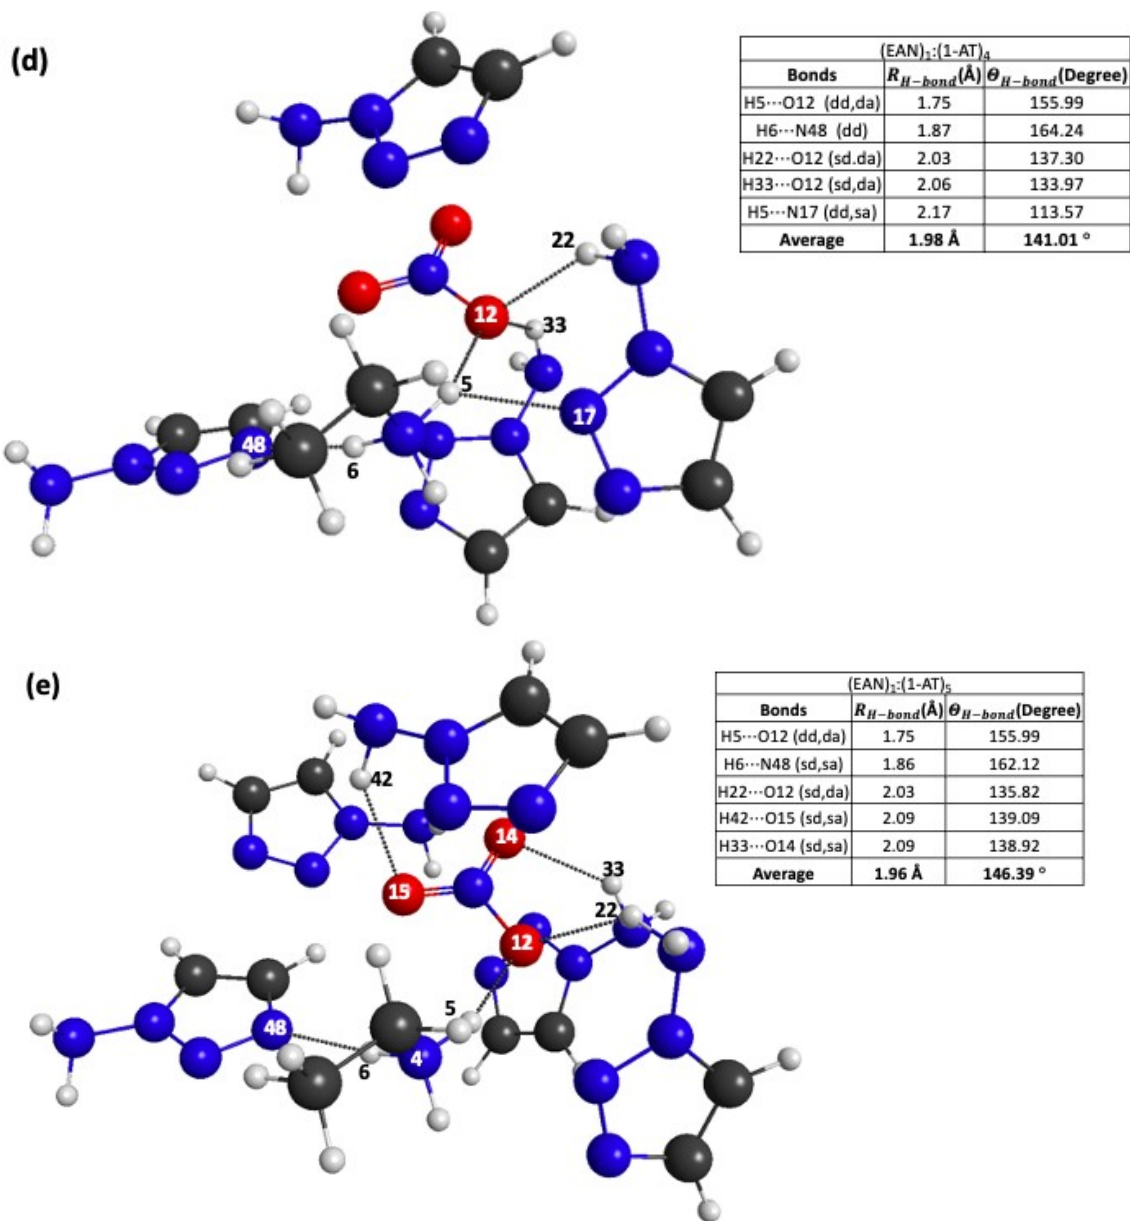

Figure S2. The second lowest energy geometry from EFP MC sampled geometries for  $(\text{EAN})_1:(1\text{-AT})_n$  ( $n=1-5$ ). Atoms that have H-bonding interactions are indicated by atom numbers and listed under “Bonds”. Hydrogen bonds are indicated with dotted lines.  $R_{H-bond}$  represents the distance between a hydrogen atom from  $[\text{EA}]^+$  and an oxygen atom from  $[\text{NO}_3]^-$  that form a H-bond. Units are in Å.  $\theta_{H-bond}$  is the angle measured in ethylammonium N-H...O (nitrate).

(a)

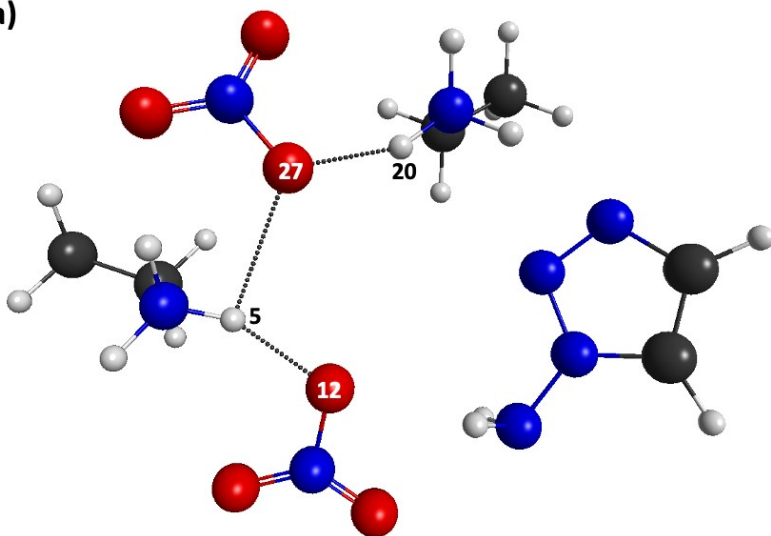

| (EAN) <sub>2</sub> :(1-AT) <sub>1</sub> |                         |                              |
|-----------------------------------------|-------------------------|------------------------------|
| Bonds                                   | R <sub>H-bond</sub> (Å) | ∠ <sub>H-bond</sub> (Degree) |
| H5...O12                                | 1.75                    | 155.99                       |
| H5-O27                                  | 2.35                    | 98.06                        |
| O27-H20                                 | 1.75                    | 155.99                       |
| Average                                 | 1.95 Å                  | 136.68 °                     |

(b)

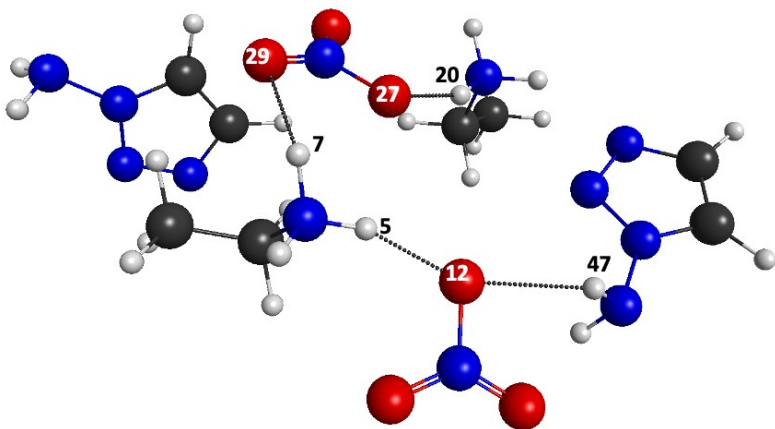

| (EAN) <sub>2</sub> :(1-AT) <sub>2</sub> |                         |                              |
|-----------------------------------------|-------------------------|------------------------------|
| Bonds                                   | R <sub>H-bond</sub> (Å) | ∠ <sub>H-bond</sub> (Degree) |
| H5...O12                                | 1.75                    | 141.78                       |
| H47-O12                                 | 2.14                    | 133.18                       |
| H7-O29                                  | 1.99                    | 138.79                       |
| H20-O27                                 | 1.75                    | 155.99                       |
| Average                                 | 1.91 Å                  | 142.44 °                     |

(c)

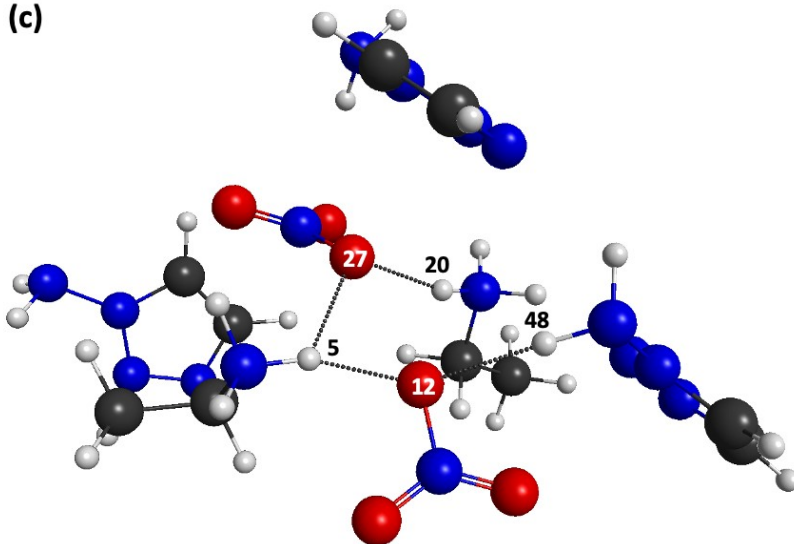

| (EAN) <sub>2</sub> :(1-AT) <sub>3</sub> |                         |                              |
|-----------------------------------------|-------------------------|------------------------------|
| Bonds                                   | R <sub>H-bond</sub> (Å) | θ <sub>H-bond</sub> (Degree) |
| H5...O12                                | 1.75                    | 155.99                       |
| H5...O27                                | 1.90                    | 121.41                       |
| H20...O27                               | 1.75                    | 155.99                       |
| H48...O12                               | 2.07                    | 167.73                       |
| <b>Average</b>                          | <b>1.87 Å</b>           | <b>150.28°</b>               |

(d)

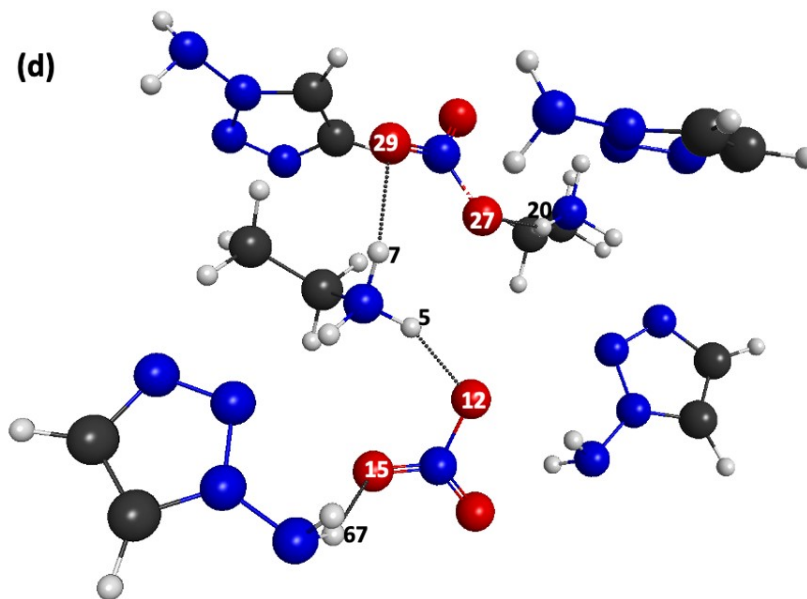

| (EAN) <sub>2</sub> :(1-AT) <sub>4</sub> |                         |                              |
|-----------------------------------------|-------------------------|------------------------------|
| Bonds                                   | R <sub>H-bond</sub> (Å) | θ <sub>H-bond</sub> (Degree) |
| H5...O12                                | 1.75                    | 141.78                       |
| H7...O29                                | 1.86                    | 157.29                       |
| H20...O27                               | 1.75                    | 155.99                       |
| H67...O15                               | 2.13                    | 151.15                       |
| <b>Average</b>                          | <b>1.87 Å</b>           | <b>151.55 °</b>              |



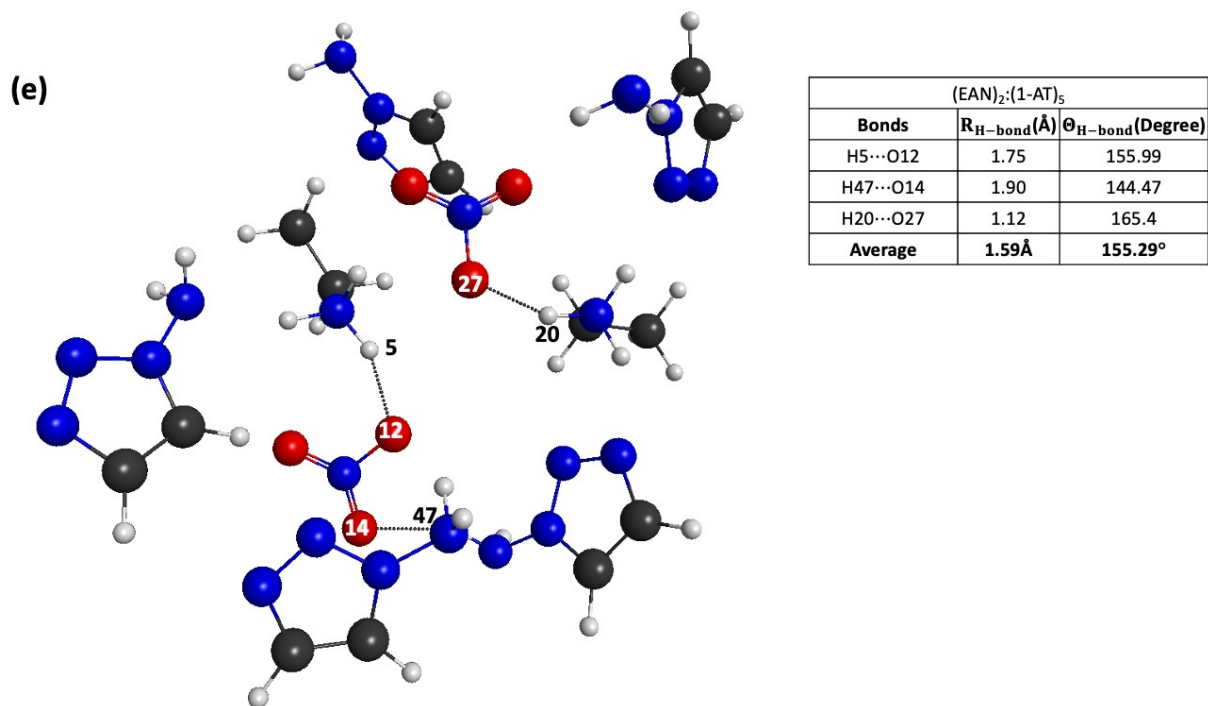

Figure S3. The second lowest energy geometry from EFP MC sampled geometries for  $(\text{EAN})_2:(1\text{-AT})_n$  ( $n=1-5$ ). Atoms that have H-bonding interactions are indicated by atom numbers and listed under “Bonds”. Hydrogen bonds are indicated with dotted lines.  $R_{H-bond}$  represents the distance between a hydrogen atom from  $[\text{EA}]^+$  and an oxygen atom from  $[\text{NO}_3]^-$  that form a H-bond. Units are in  $\text{\AA}$ .  $\Theta_{H-bond}$  is the angle measured in ethylammonium  $\text{N-H}\cdots\text{O}$  (nitrate).
